# Supplementary material for: Germicidal lamps using UV-C radiation may pose health safety issues: a biomolecular analysis of their effects on apoptosis and senescence
Source: publisher site journal article supplement (doi:10.18632/aging.205787), 2024-05-02

**Supplementary File 1. WB Raw data. The file contains the original blots of data showed in Figure 4.**

# HDF

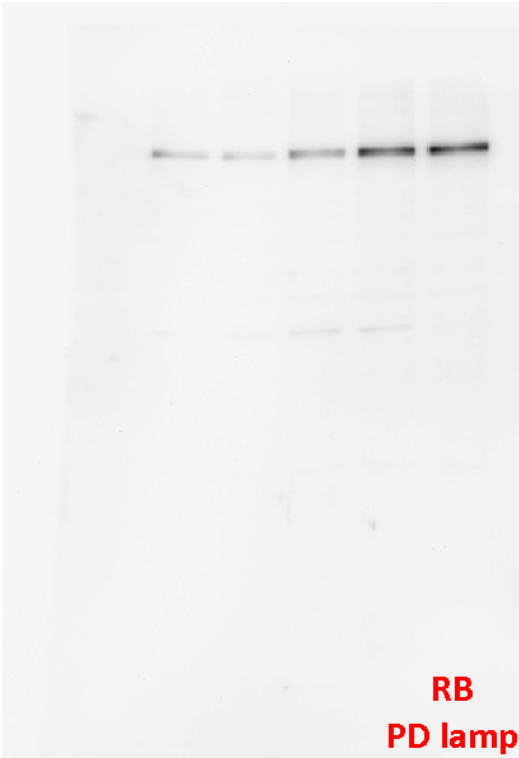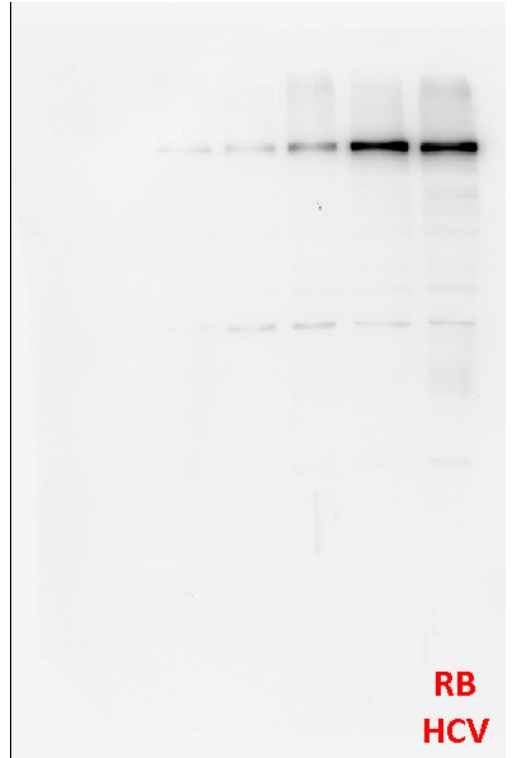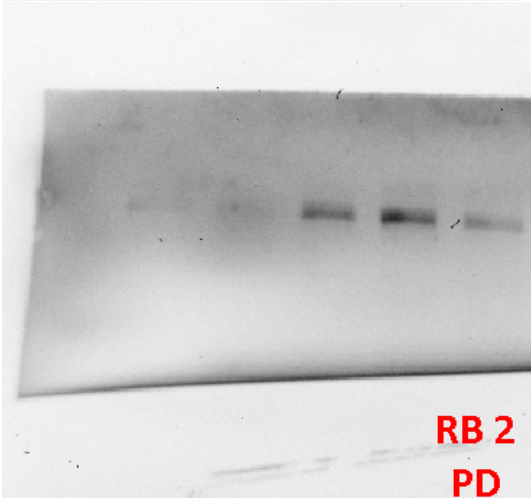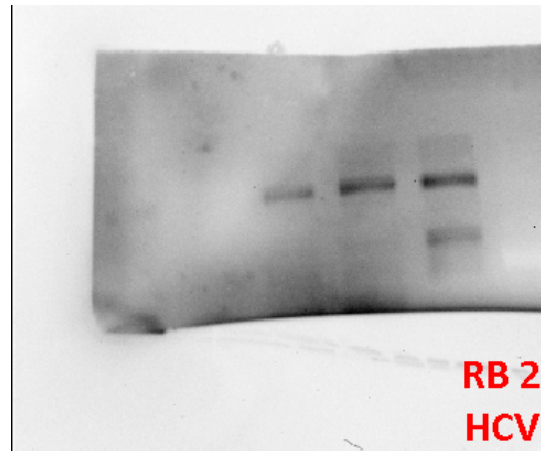

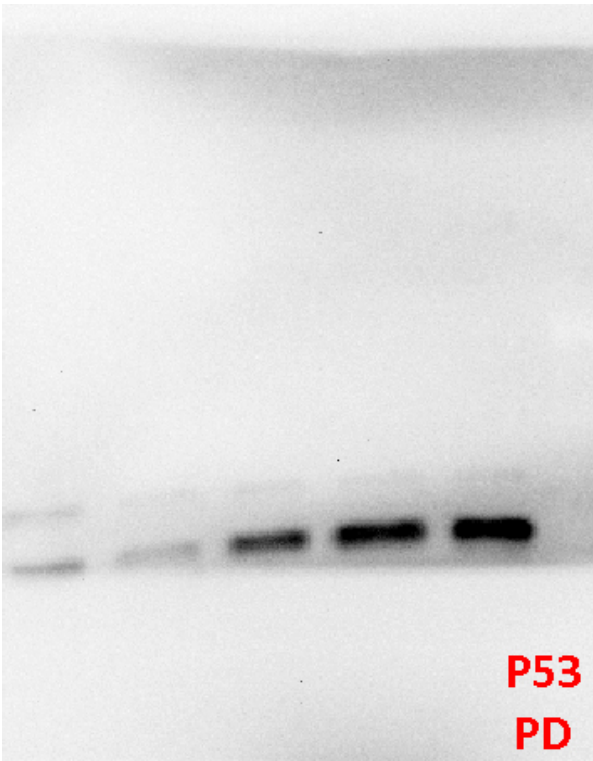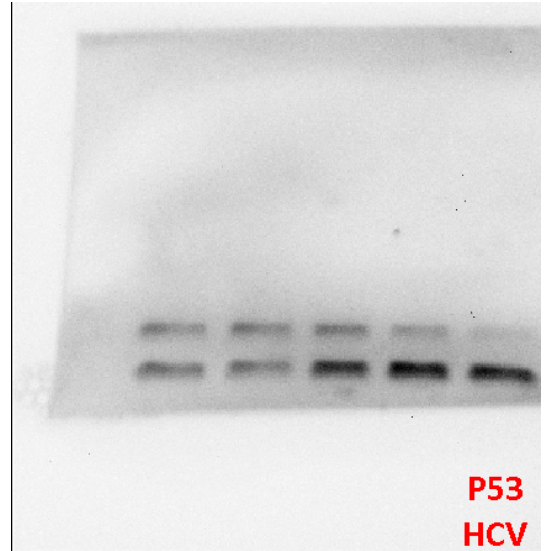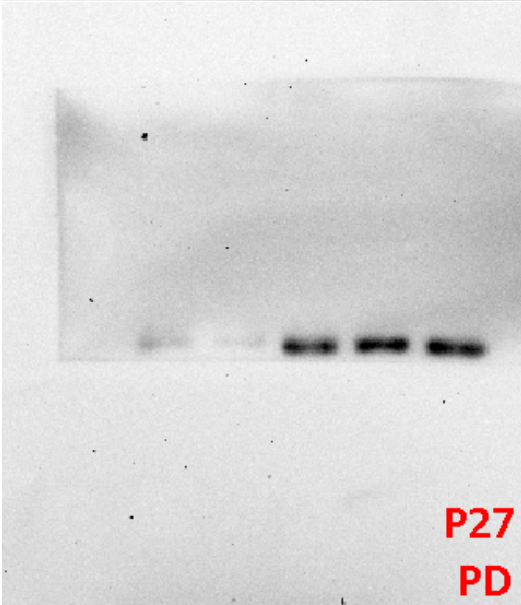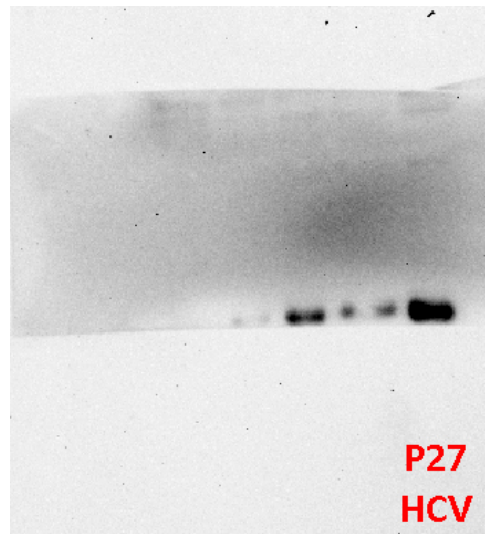

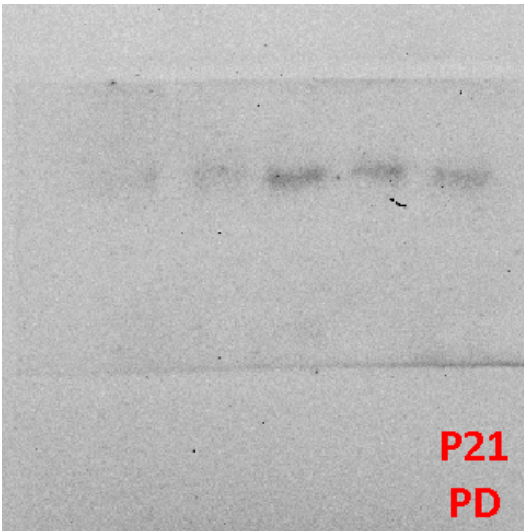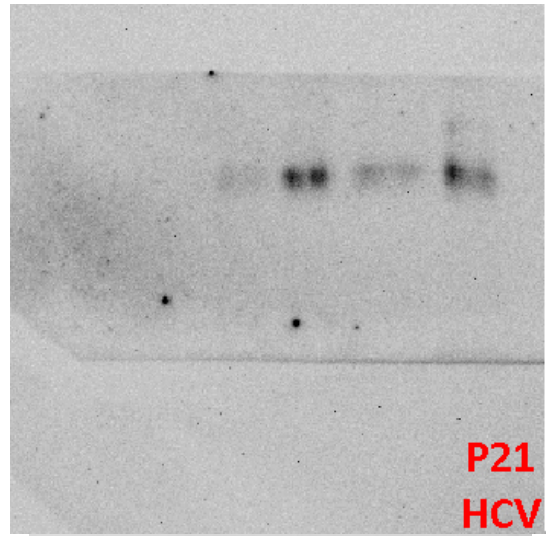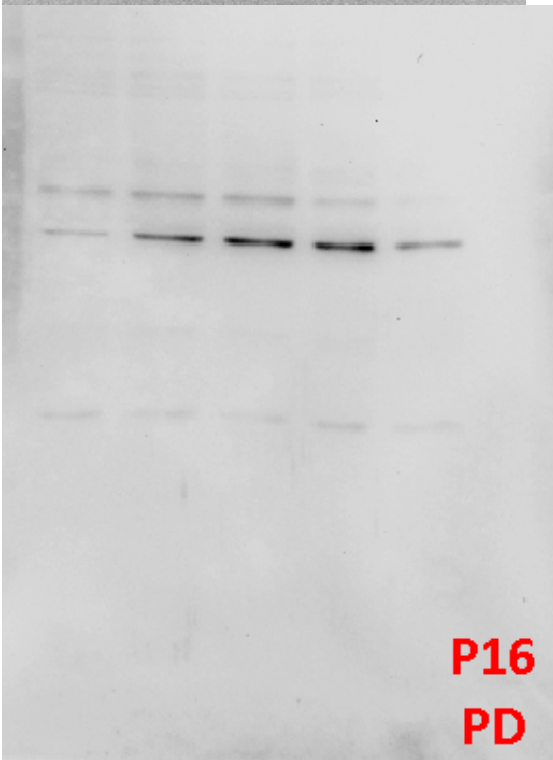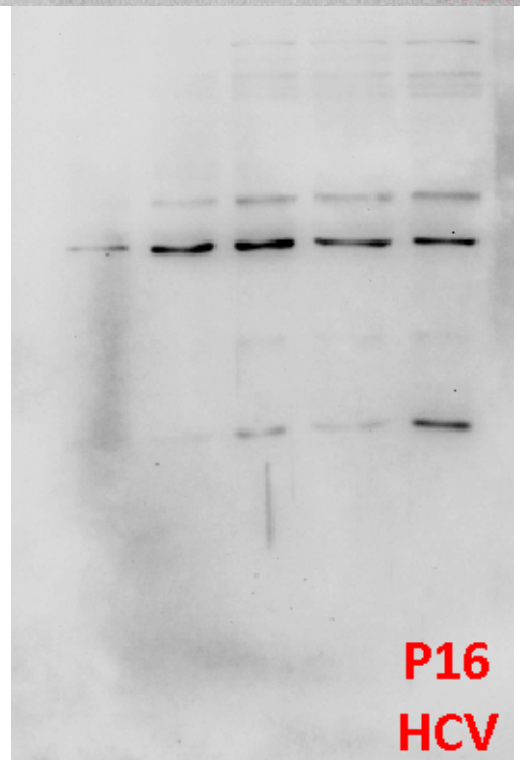

# HaCaT

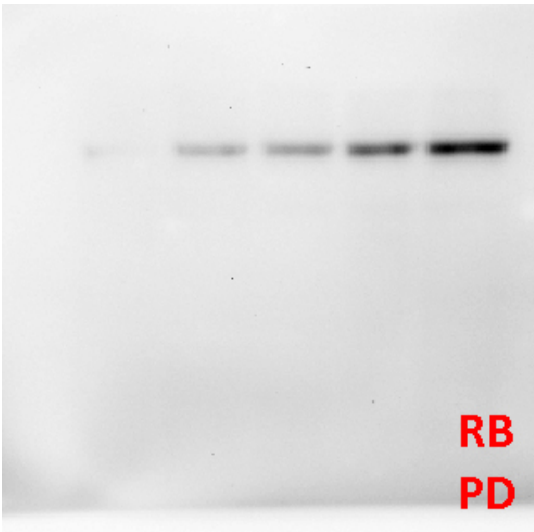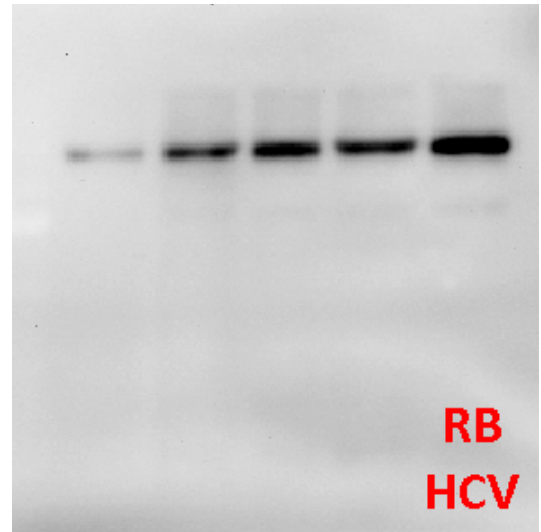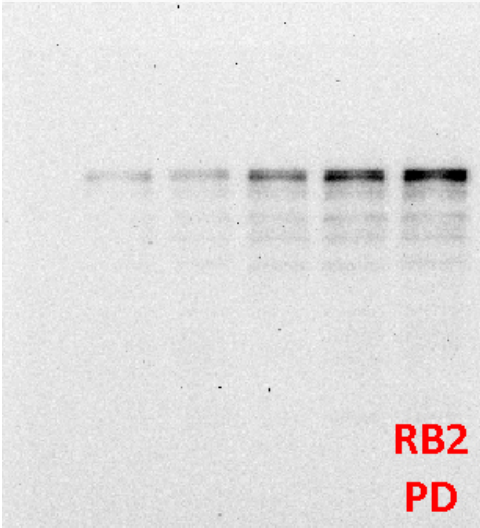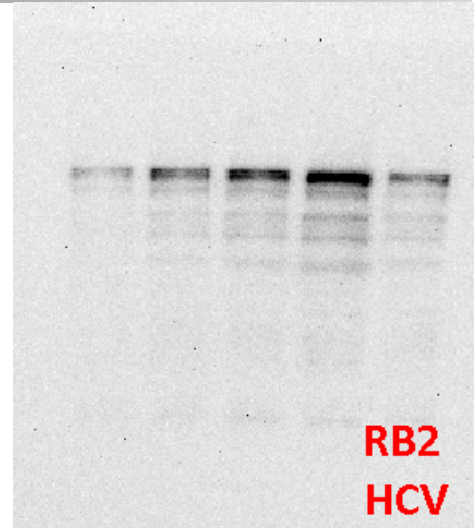

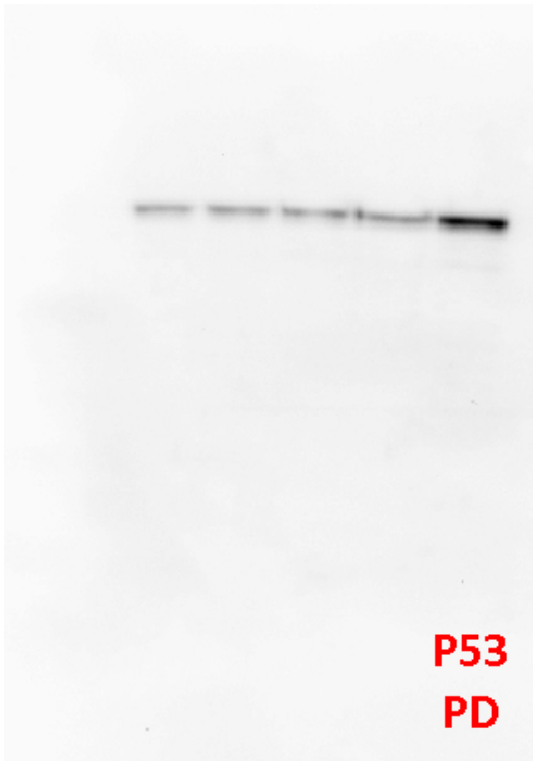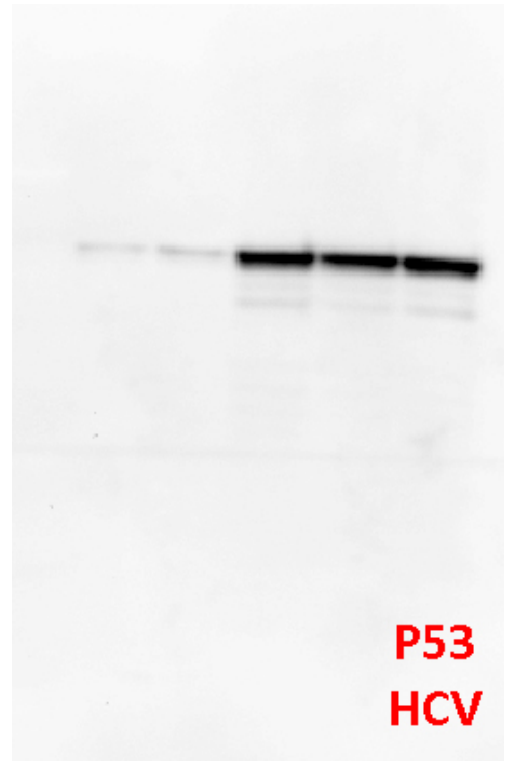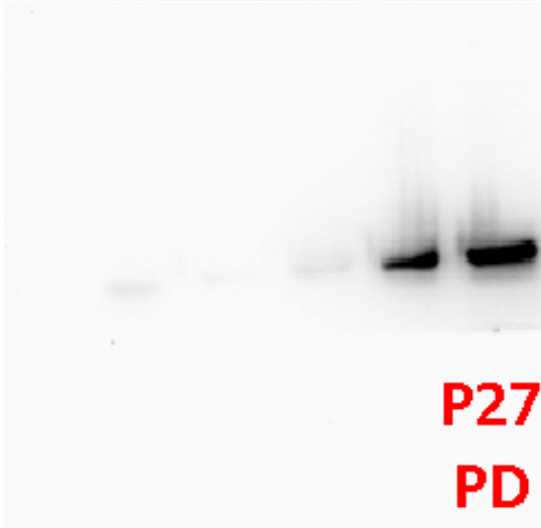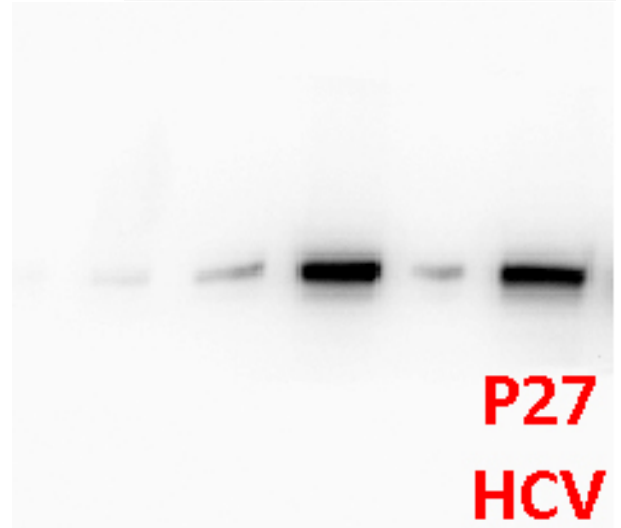

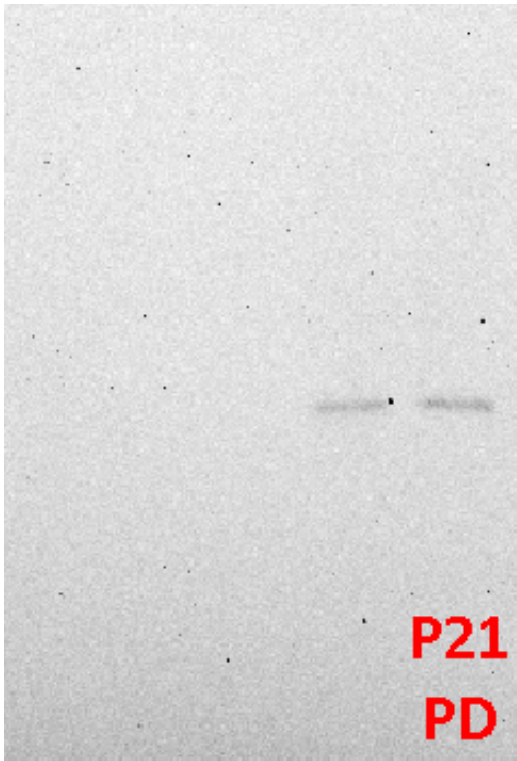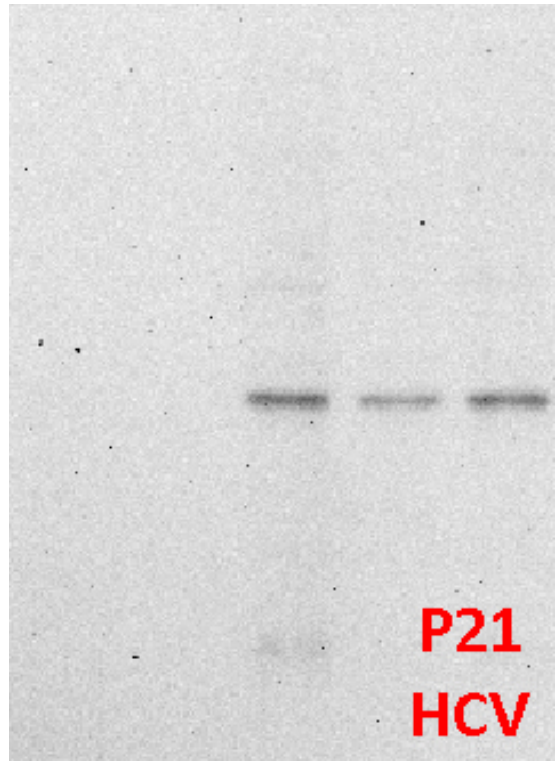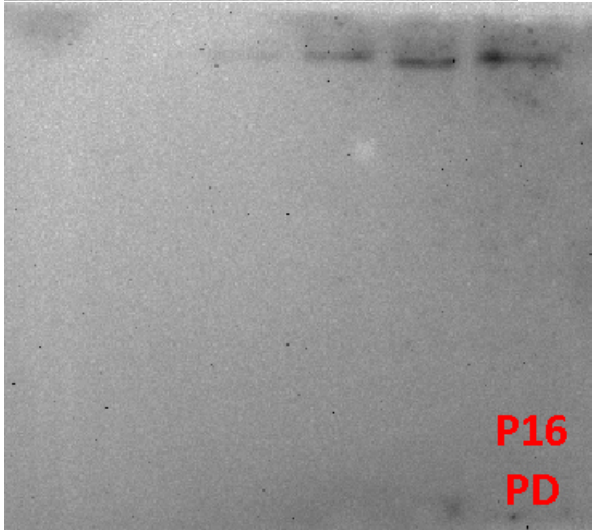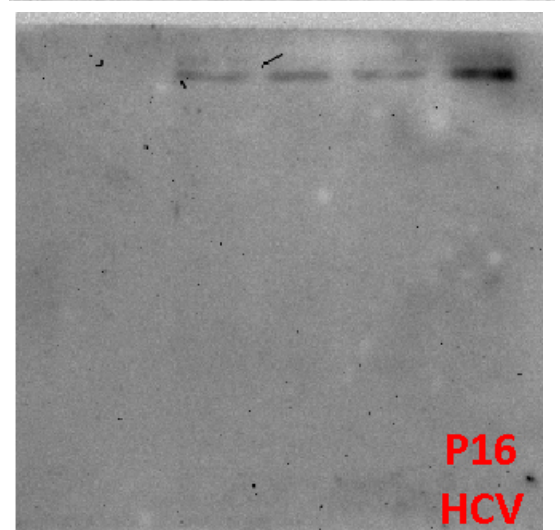

# ARPE-19

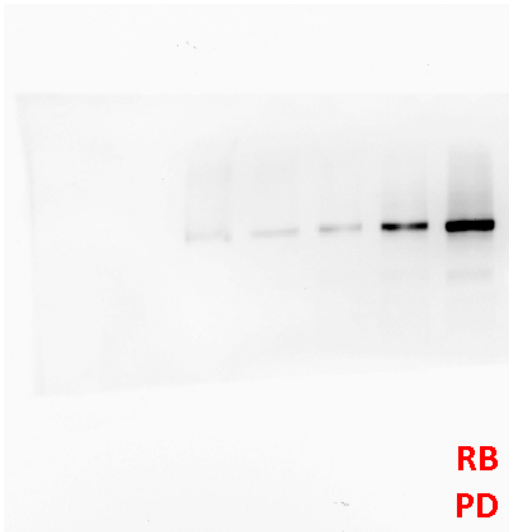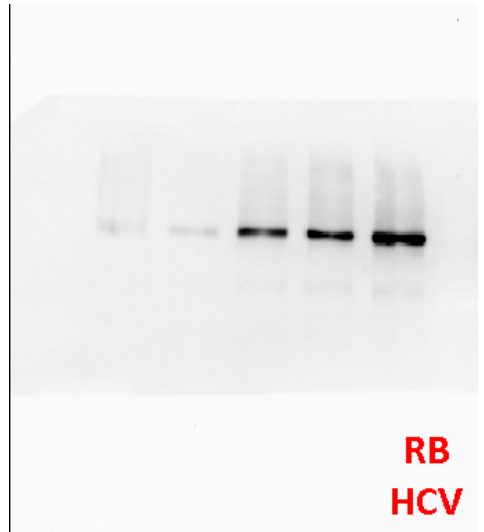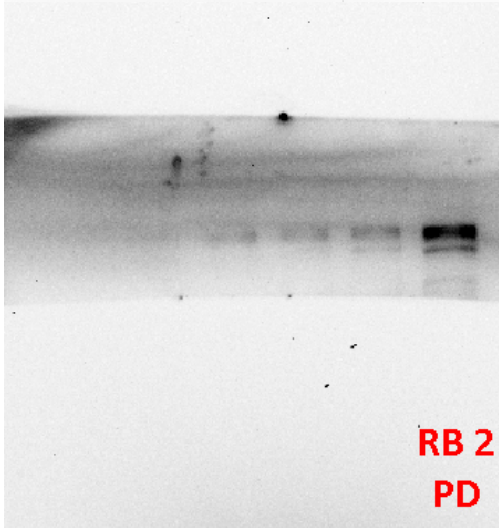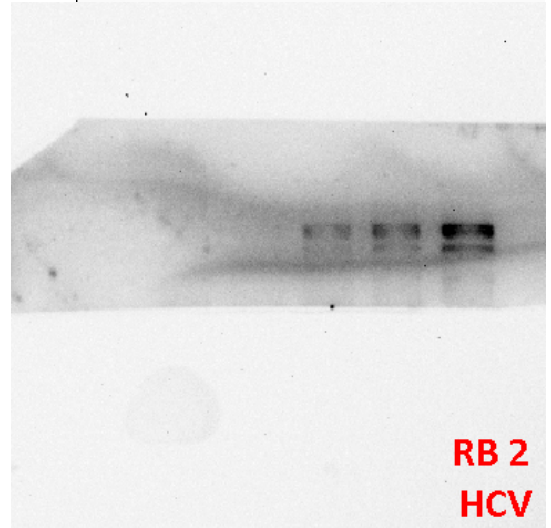



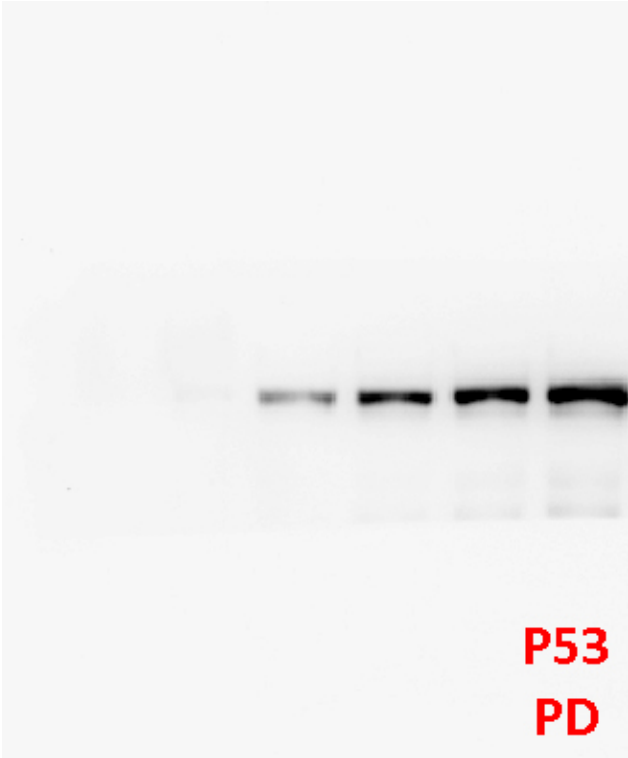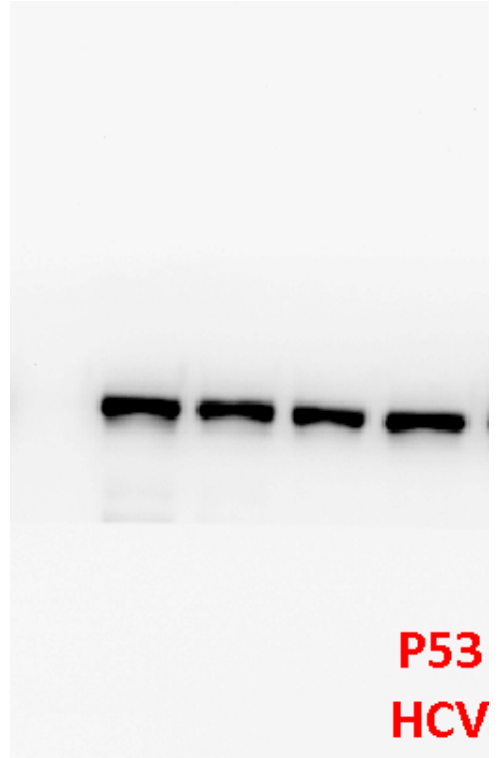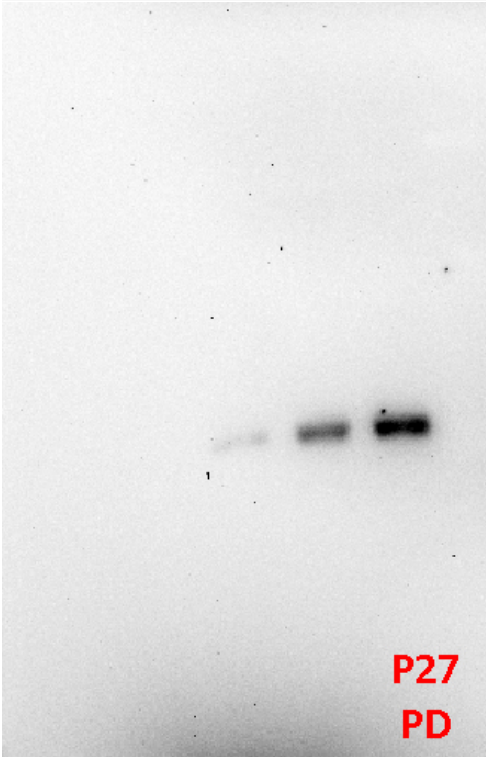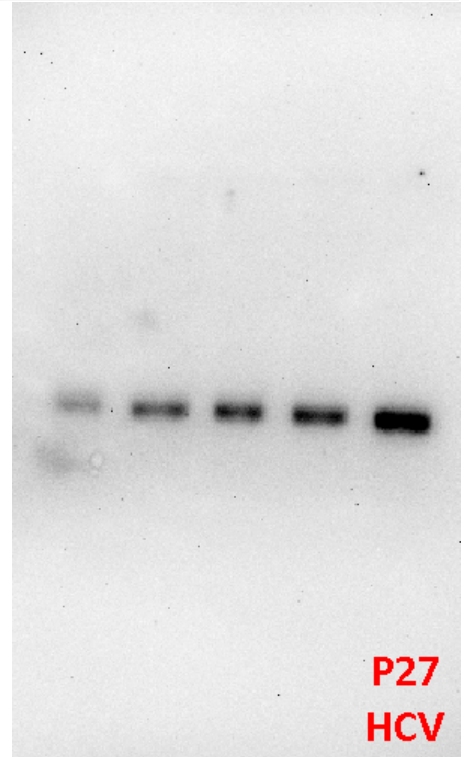

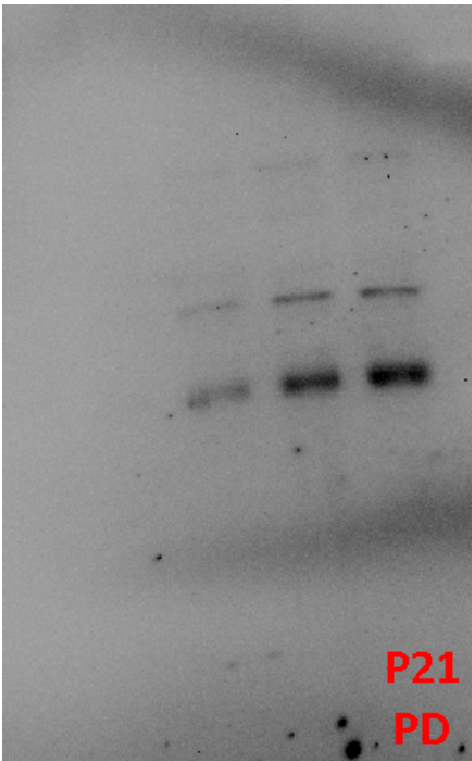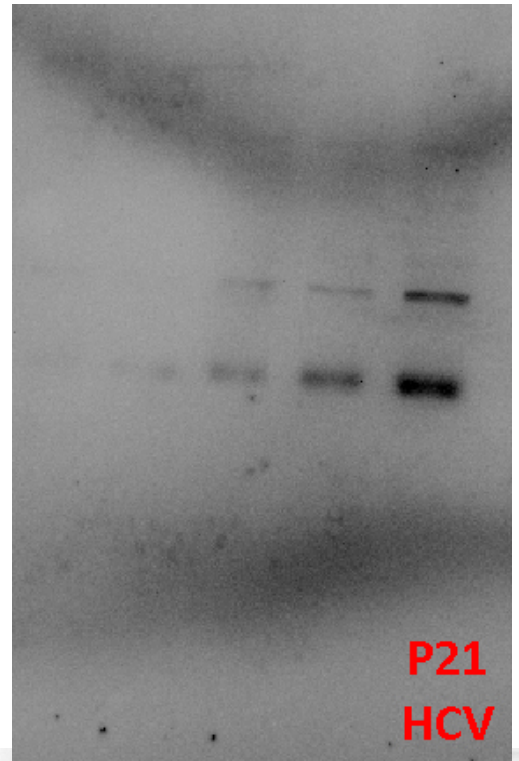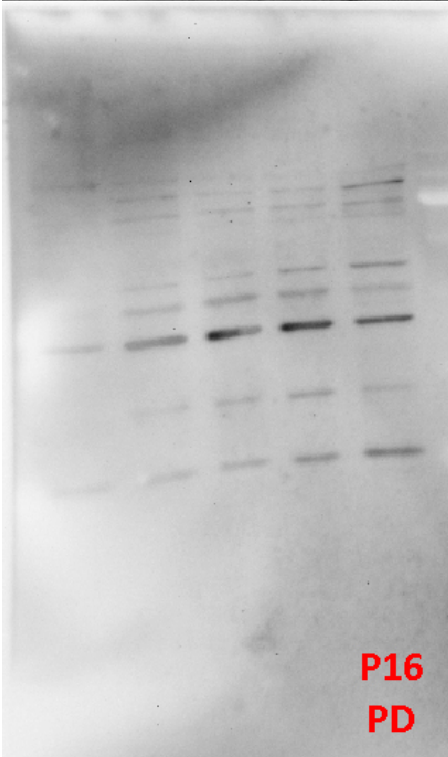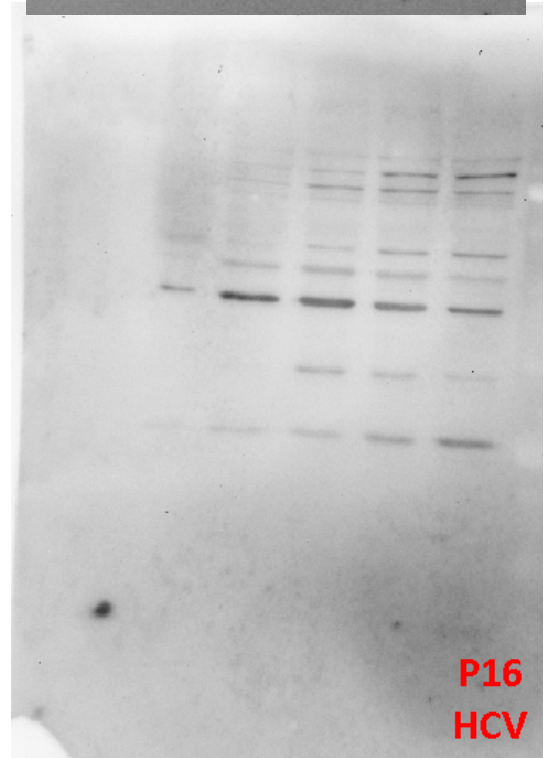

Supplement: Supplementary file [file aging-v16i9-205787-supplementary-material-SD1.pdf]
